# Supplementary material for: Novel roles of DNA variation in maintenance of AT rich genome and conserved function in rats
Source: Research Square preprint supplement (doi:10.21203/rs.3.rs-343453/v1), 2021-03-30
Supplement: Supplementary file 1 [file 474679f0c982c4357e01bb28.xlsx]

## Sheet: Sheet1
Scaffold (Chr1)	Position	Ref allele	Mutant allele	Type	Region	WI genotype	WI reads	WI bi-allele	HS genotype	HS reads	HS bi-allele
NC_005100.4	32320326	G	T	SNPs	Downstream	0/1	21	12,9	0/0	19	19,0
NC_005100.4	32320655	C	T	SNPs	Downstream	0/1	20	9,11	0/0	36	36,0
NC_005100.4	32320751	TTCTA	T	INDELs	Downstream	0/1	28	12,16	0/0	27	27,0
NC_005100.4	32320988	CAAG	C	INDELs	3'UTR	0/1	27	13,14	0/0	31	31,0
NC_005100.4	32321008	A	G	SNPs	3'UTR	0/1	28	15,13	0/0	27	27,0
NC_005100.4	32321285	C	T	SNPs	3'UTR	0/1	31	14,17	0/0	24	24,0
NC_005100.4	32321451	C	T	SNPs	3'UTR	0/1	30	14,16	0/0	26	26,0
NC_005100.4	32321923	A	G	SNPs	3'UTR	0/1	20	8,12	0/0	24	24,0
NC_005100.4	32323152	T	A	SNPs	intronic	0/1	29	20,9	0/0	26	26,0
NC_005100.4	32323402	C	CAAAA	INDELs	intronic	0/1	20	17,3	0/0	15	11,0
NC_005100.4	32332495	A	AGCAGACT	INDELs	intronic	0/1	27	14,13	0/0	26	26,0
NC_005100.4	32332789	A	ATACAAGATAAGAAACCCAT	INDELs	intronic	0/1	22	11,11	0/0	23	23,0
NC_005100.4	32333814	A	G	SNPs	intronic	0/1	10	4,6	0/0	21	21,0
NC_005100.4	32334268	C	G	SNPs	intronic	0/1	8	3,5	0/0	23	23,0
NC_005100.4	32334301	T	C	SNPs	intronic	0/1	8	3,5	0/0	23	23,0
NC_005100.4	32334990	T	TC	INDELs	intronic	0/1	22	6,16	0/0	15	15,0
NC_005100.4	32335172	T	C	SNPs	intronic	0/1	31	13,18	0/0	20	20,0
NC_005100.4	32335177	C	T	SNPs	intronic	0/1	31	13,18	0/0	18	18,0
NC_005100.4	32335309	G	A	SNPs	intronic	0/1	33	23,10	0/0	24	24,0
NC_005100.4	32335992	T	C	SNPs	intronic	0/1	42	22,20	0/0	23	23,0
NC_005100.4	32337999	G	A	SNPs	exonic	0/1	17	13,4	0/0	30	30,0
NC_005100.4	32338529	C	T	SNPs	intronic	0/1	23	11,12	0/0	22	22,0
NC_005100.4	32338793	G	A	SNPs	intronic	0/1	35	20,15	0/0	28	28,0
NC_005100.4	32338941	G	T	SNPs	intronic	0/1	22	11,11	0/0	15	15,0
NC_005100.4	32339132	G	A	SNPs	intronic	0/1	17	11,6	0/0	27	27,0
NC_005100.4	32339434	C	T	SNPs	exonic	0/1	22	9,13	0/0	31	31,0
NC_005100.4	32341062	A	AT	INDELs	intronic	0/1	20	11,9	0/0	20	20,0
NC_005100.4	32342151	C	T	SNPs	exonic	0/1	23	13,10	0/0	26	26,0
NC_005100.4	32342813	G	A	SNPs	intronic	0/1	23	11,12	0/0	8	8,0
NC_005100.4	32343850	AAGGAGT	A	INDELs	intronic	0/1	16	8,8	0/0	27	27,0
NC_005100.4	32343899	G	A	SNPs	intronic	0/1	13	6,7	0/0	28	28,0
NC_005100.4	32345200	C	T	SNPs	intronic	0/1	24	14,10	0/0	10	10,0
NC_005100.4	32345203	T	C	SNPs	intronic	0/1	24	14,10	0/0	10	10,0
NC_005100.4	32345211	A	T	SNPs	intronic	0/1	24	14,10	0/0	9	9,0
NC_005100.4	32345242	T	C	SNPs	intronic	0/1	22	13,9	0/0	10	10,0
NC_005100.4	32345443	CA	C	INDELs	intronic	0/1	13	7,6	0/0	20	20,0
NC_005100.4	32345446	ACCC	A	INDELs	intronic	0/1	13	7,6	0/0	21	21,0
NC_005100.4	32345527	C	T	SNPs	intronic	0/1	17	10,7	0/0	27	27,0
NC_005100.4	32345743	T	A	SNPs	intronic	0/1	23	16,7	0/0	24	24,0
NC_005100.4	32345813	T	A	SNPs	intronic	0/1	15	11,4	0/0	23	23,0
NC_005100.4	32346445	C	T	SNPs	intronic	0/1	20	11,9	0/0	31	31,0
NC_005100.4	32346627	G	T	SNPs	intronic	0/1	18	12,6	0/0	28	28,0
NC_005100.4	32346713	C	T	SNPs	intronic	0/1	18	12,6	0/0	33	33,0
NC_005100.4	32347005	GA	G	INDELs	intronic	0/1	18	12,6	0/0	20	20,0
NC_005100.4	32347064	A	C	SNPs	intronic	0/1	19	14,5	0/0	20	20,0
NC_005100.4	32347346	T	C	SNPs	intronic	0/1	18	12,6	0/0	16	16,0
NC_005100.4	32347524	T	C	SNPs	intronic	0/1	16	13,3	0/0	21	21,0
NC_005100.4	32347587	G	T	SNPs	intronic	0/1	12	9,3	0/0	19	19,0
NC_005100.4	32347744	C	A	SNPs	intronic	0/1	18	8,10	0/0	30	30,0
NC_005100.4	32348179	A	G	SNPs	intronic	0/1	29	14,15	0/0	25	25,0
NC_005100.4	32348184	C	T	SNPs	intronic	0/1	28	13,15	0/0	22	22,0
NC_005100.4	32348673	T	C	SNPs	intronic	0/1	28	18,10	0/0	16	16,0
NC_005100.4	32349006	G	A	SNPs	intronic	0/1	33	14,19	0/0	16	16,0
NC_005100.4	32349202	T	TA	INDELs	intronic	0/1	33	20,13	0/0	18	18,0
NC_005100.4	32349732	A	G	SNPs	intronic	0/1	27	22,5	0/0	16	16,0
NC_005100.4	32349819	C	T	SNPs	intronic	0/1	22	15,7	0/0	18	18,0
NC_005100.4	32349870	TG	T	INDELs	intronic	0/1	26	18,8	0/0	16	16,0
NC_005100.4	32349971	TA	T	INDELs	intronic	0/1	30	16,14	0/0	14	14,0
NC_005100.4	32350136	G	GT	INDELs	intronic	0/1	22	13,9	0/0	18	18,0
NC_005100.4	32350468	C	T	SNPs	intronic	0/1	34	16,18	0/0	19	19,0
NC_005100.4	32350502	A	G	SNPs	intronic	0/1	34	19,15	0/0	22	22,0
NC_005100.4	32350570	T	A	SNPs	intronic	0/1	23	13,10	0/0	25	25,0
NC_005100.4	32351456	G	A	SNPs	intronic	0/1	19	15,4	0/0	23	23,0
NC_005100.4	32352052	A	T	SNPs	intronic	0/1	27	12,15	0/0	26	26,0
NC_005100.4	32352096	A	T	SNPs	intronic	0/1	24	11,13	0/0	25	25,0
NC_005100.4	32352723	T	C	SNPs	intronic	0/1	23	15,8	0/0	26	26,0
NC_005100.4	32353682	C	T	SNPs	intronic	0/1	29	18,11	0/0	23	23,0
NC_005100.4	32353728	C	T	SNPs	intronic	0/1	21	12,9	0/0	27	27,0
NC_005100.4	32354533	T	C	SNPs	intronic	0/1	34	22,12	0/0	33	33,0
NC_005100.4	32354581	G	A	SNPs	intronic	0/1	28	18,10	0/0	36	36,0
NC_005100.4	32354790	G	A	SNPs	exonic	0/0	15	15,0	0/1	22	11,11
NC_005100.4	32355341	A	G	SNPs	intronic	0/1	19	14,5	0/0	16	16,0
NC_005100.4	32355568	T	C	SNPs	intronic	0/1	20	9,11	0/0	16	16,0
NC_005100.4	32355720	A	T	SNPs	intronic	0/1	25	14,11	0/0	24	24,0
NC_005100.4	32356153	T	C	SNPs	intronic	0/1	21	16,5	0/0	19	19,0
NC_005100.4	32356193	C	A	SNPs	intronic	0/1	22	15,7	0/0	16	16,0
NC_005100.4	32356308	A	C	SNPs	intronic	0/1	23	14,9	0/0	18	18,0
NC_005100.4	32356366	T	G	SNPs	intronic	0/1	22	14,8	0/0	15	15,0
NC_005100.4	32356386	T	C	SNPs	intronic	0/1	21	13,8	0/0	15	15,0
NC_005100.4	32356398	A	C	SNPs	intronic	0/1	23	15,8	0/0	15	15,0
NC_005100.4	32356491	A	C	SNPs	intronic	0/1	23	13,10	0/0	10	10,0
NC_005100.4	32356532	A	C	SNPs	intronic	0/1	23	13,10	0/0	10	10,0
NC_005100.4	32356562	C	G	SNPs	intronic	0/1	20	11,9	0/0	16	16,0
NC_005100.4	32356564	C	T	SNPs	intronic	0/1	19	10,9	0/0	16	16,0
NC_005100.4	32356706	AAC	A	INDELs	intronic	0/1	18	12,6	0/0	12	12,0
NC_005100.4	32356775	A	G	SNPs	intronic	0/1	24	13,11	0/0	15	15,0
NC_005100.4	32356860	GCT	G	INDELs	intronic	0/1	25	14,11	0/0	12	12,0
NC_005100.4	32356900	T	A	SNPs	intronic	0/1	25	12,13	0/0	16	16,0
NC_005100.4	32356901	C	T	SNPs	intronic	0/1	25	12,13	0/0	16	16,0
NC_005100.4	32357401	C	A	SNPs	intronic	0/1	24	6,18	0/0	20	20,0
NC_005100.4	32357584	C	CCTACAGGCTTGT	INDELs	intronic	0/1	27	14,13	0/0	22	22,0
NC_005100.4	32358771	C	T	SNPs	intronic	0/1	15	5,10	0/0	16	16,0
NC_005100.4	32360549	G	A	SNPs	intronic	0/1	18	11,7	0/0	20	20,0
NC_005100.4	32364502	G	A	SNPs	upstream	0/1	31	15,16	0/0	20	20,0
NC_005100.4	32365645	T	C	SNPs	upstream	0/1	32	16,16	0/0	24	24,0
