# Supplementary material for: Novel roles of DNA variation in maintenance of AT rich genome and conserved function in rats
Source: Research Square preprint supplement (doi:10.21203/rs.3.rs-343453/v1), 2021-03-30
Supplement: Supplementary file 2 [file 5b44105b297f93b1cbfb974e.xlsx]

## Sheet: Sheet1
Bi-allelic SNPs
Group	Downstream	Exonic	xonic\X3Bsplicing	Intergenic	Intronic	Splicing	Upstream	Upstream\X3Bdownstream	Utr3	Utr5	Utr5\X3Butr3	Total
C—>T	4619	6639	2	400994	252956	16	3925	105	5423	2883	2	677564
G—>A	4673	6592	3	400368	252274	13	3920	110	5521	2944	2	676420
T—>C	3699	4922	0	337001	206082	11	3166	109	4354	2234	1	561579
A—>G	3812	4848	1	336115	206098	19	3114	85	4339	2225	2	560658
C—>A	994	977	0	104922	55184	4	1066	27	1060	680	0	164914
G—>T	906	1006	0	105073	54502	6	1025	24	1042	668	1	164253
A—>C	893	751	0	93241	48311	4	853	20	977	538	0	145588
T—>G	901	742	1	92781	48570	3	843	19	959	560	2	145381
A—>T	847	571	0	97673	49564	5	886	30	930	545	0	151051
T—>A	881	569	0	97100	49381	7	870	19	944	514	0	150285
C—>G	690	861	1	71815	39742	2	800	23	809	679	0	115422
G—>C	713	829	0	72163	39849	1	782	25	770	653	0	115785
INDELs- 1 bp
Group	Downstream	Exonic	Exonic\X3Bsplicing	Intergenic	Intronic	Splicing	Upstream	Upstream\X3Bdownstream	Utr3	Utr5	Utr5\X3Butr3	Total
A Ac	84	7	0	6624	4101	2	82	5	108	37	0	11050
A Ag	83	9	0	6738	4095	0	89	1	102	44	0	11161
A At	252	21	0	22518	12089	1	196	6	332	98	0	35513
Ac A	104	10	0	8004	4720	1	70	5	94	66	0	13074
Ag A	103	18	1	8118	4659	1	93	2	92	46	0	13133
At A	234	18	0	23101	11731	0	199	3	310	90	0	35686
C Ca	127	10	0	12266	7172	1	131	5	180	51	0	19943
C Cg	19	6	0	1594	1208	0	54	1	37	37	0	2956
C Ct	201	15	0	15436	9592	1	186	2	261	86	1	25781
Ca C	135	14	0	12540	7192	1	128	4	175	67	0	20256
Cg C	33	5	0	1671	1323	0	38	0	41	36	0	3147
Ct C	212	14	0	15687	9341	3	196	3	230	88	0	25774
G Ga	190	20	0	17708	10151	0	200	3	266	88	0	28626
G Gc	54	11	0	3263	2218	0	56	1	60	33	0	5696
G Gt	158	10	0	12209	7092	0	140	4	202	64	0	19879
Ga G	201	13	0	17526	9934	2	187	4	237	103	0	28207
Gc G	54	12	0	3831	2619	0	69	1	70	49	0	6705
Gt G	130	13	0	11789	6872	2	134	3	183	64	0	19190
T Ta	229	9	0	19726	11394	9	227	4	309	84	0	31991
T Tc	88	14	0	6495	3922	0	75	3	112	50	0	10759
T Tg	115	4	0	8003	5047	6	99	3	113	57	0	13447
Ta T	217	9	0	20252	11328	1	211	3	278	97	0	32396
Tc T	98	12	1	7525	4570	0	89	4	86	58	0	12443
Tg T	137	13	0	9440	5698	0	111	2	111	63	0	15575
Total	3258	287	2	272064	158068	31	3060	72	3989	1556	1	442388
Percentage	0.736458	0.0648752	0.000452092	61.499	35.7306	0.00700742	0.6917	0.0162753	0.901697	0.351727	0.000226046	100
INDEL-2 bp
Group	Downstream	Exonic	Exonic\X3Bsplicing	Intergenic	Intronic	Splicing	Upstream	Upstream\X3Bdownstream	Utr3	Utr5	Utr5\X3Butr3	Total
A Aac	17	1	0	1466	887	0	16	1	25	8	0	2421
A Aag	10	4	0	868	540	0	8	1	14	4	0	1449
A Aat	12	1	0	1205	639	0	15	1	15	10	0	1898
A Acc	11	2	0	555	389	0	6	0	5	3	0	971
A Acg	2	1	0	362	236	0	7	0	5	2	0	615
A Act	13	0	0	719	451	0	14	0	5	2	0	1204
A Agc	5	0	0	160	106	0	0	0	3	2	0	276
A Agg	5	2	0	534	335	0	11	0	5	3	0	895
A Agt	8	2	0	865	613	0	13	0	9	1	0	1511
A Atc	4	1	0	396	228	0	7	0	3	2	0	641
A Atg	25	3	0	1735	1148	0	13	1	21	3	0	2949
A Att	40	0	0	2301	1302	0	10	2	38	13	0	3706
Aac A	25	4	0	1833	1132	0	19	0	21	11	0	3045
Aag A	12	2	0	1064	623	0	12	2	17	8	0	1740
Aat A	18	2	0	1328	702	0	11	1	17	8	0	2087
Acc A	9	1	0	571	407	0	9	0	11	5	0	1013
Acg A	3	0	0	314	302	0	2	0	2	1	0	624
Act A	13	3	0	1004	605	0	6	1	15	9	0	1656
Agc A	2	2	0	226	152	0	0	0	4	2	0	388
Agg A	4	2	0	514	329	0	10	0	10	3	0	872
Agt A	19	1	0	1060	774	0	17	0	11	4	0	1886
Atc A	9	1	0	534	330	0	9	1	7	2	0	893
Atg A	30	3	0	2084	1249	0	14	0	16	8	0	3404
Att A	31	1	0	1969	1143	0	23	0	33	7	0	3207
C Caa	18	0	0	1964	1100	0	29	0	30	8	0	3149
C Cag	19	2	0	1054	793	0	13	0	24	7	0	1912
C Cat	21	1	0	1984	1154	0	19	0	29	7	0	3215
C Cca	7	0	0	548	425	0	10	1	11	4	0	1006
C Ccg	2	0	0	83	67	0	2	0	2	4	0	160
C Cct	9	1	0	552	407	1	4	0	10	8	0	992
C Cga	2	1	0	104	81	0	1	0	1	1	0	191
C Cgg	2	1	0	149	103	0	5	1	7	2	0	270
C Cgt	13	0	0	713	568	0	12	0	9	3	0	1318
C Cta	9	0	0	558	326	0	5	0	11	3	0	912
C Ctg	21	2	0	1343	993	0	17	0	24	6	0	2406
C Ctt	37	3	0	2623	1598	0	23	0	35	12	0	4331
Caa C	27	1	0	1788	1045	0	20	0	28	6	0	2915
Cag C	19	6	0	1343	983	0	27	0	16	12	0	2406
Cat C	27	0	0	1988	1208	0	17	0	18	5	0	3263
Cca C	9	0	0	699	482	0	8	0	9	3	0	1210
Ccg C	3	1	0	90	80	0	2	0	1	4	0	181
Cct C	9	2	0	677	455	0	11	0	10	9	0	1173
Cga C	0	0	0	109	82	0	1	0	2	1	0	195
Cgg C	1	2	0	112	109	0	3	0	3	2	0	232
Cgt C	14	0	0	843	674	0	4	1	11	5	0	1552
Cta C	7	1	0	582	369	0	8	0	13	5	0	985
Ctg C	24	5	0	1736	1230	0	16	1	17	10	0	3039
Ctt C	48	1	0	2802	1586	1	36	0	27	10	0	4511
G Gaa	21	4	0	2126	1271	0	25	1	33	17	0	3498
G Gac	12	2	0	785	548	0	11	0	5	2	0	1365
G Gat	4	0	0	530	298	0	4	0	8	4	0	848
G Gca	16	2	0	1126	861	0	9	0	14	3	0	2031
G Gcc	6	0	0	261	217	0	3	0	1	3	0	491
G Gct	5	0	0	309	212	0	1	0	9	4	0	540
G Gga	6	2	0	486	314	0	7	0	5	3	0	823
G Ggc	3	0	0	116	94	0	3	0	4	2	0	222
G Ggt	10	0	0	664	510	0	7	1	7	3	0	1202
G Gta	19	1	0	1197	761	1	10	0	14	5	0	2008
G Gtc	4	0	0	628	434	0	6	0	3	6	0	1081
G Gtt	22	1	0	1921	1165	0	20	1	25	9	0	3164
Gaa G	38	0	0	1892	1208	0	27	1	31	14	0	3211
Gac G	10	2	0	990	651	0	13	0	16	4	0	1686
Gat G	7	1	0	546	326	0	6	0	6	3	0	895
Gca G	25	2	0	1261	957	0	14	0	13	5	0	2277
Gcc G	3	0	0	312	200	0	5	0	5	2	0	527
Gct G	4	2	0	341	238	0	4	0	6	4	0	599
Gga G	8	1	0	565	396	0	7	0	10	1	0	988
Ggc G	7	1	0	146	104	0	1	0	2	2	0	263
Ggt G	12	2	0	857	604	3	8	1	18	1	0	1506
Gta G	11	1	0	1146	738	0	10	1	3	0	0	1910
Gtc G	12	0	0	784	453	0	12	0	9	3	0	1273
Gtt G	22	1	0	1695	983	0	11	0	22	6	0	2740
T Taa	32	0	0	2664	1681	2	28	2	43	16	0	4468
T Tac	22	1	0	1716	1120	0	13	1	9	4	0	2886
T Tag	5	1	0	411	250	2	5	0	7	3	0	684
T Tca	8	1	0	778	554	0	12	1	6	4	0	1364
T Tcc	6	2	0	582	370	0	10	0	12	4	0	986
T Tcg	2	0	0	75	49	1	3	0	4	2	0	136
T Tga	2	0	0	526	292	2	3	1	7	4	0	837
T Tgc	11	0	0	488	419	0	5	0	5	3	0	931
T Tgg	16	1	0	751	488	1	7	0	10	5	0	1279
T Tta	20	0	0	1200	695	0	11	0	16	6	0	1948
T Ttc	17	1	0	925	545	0	12	1	9	4	0	1514
T Ttg	12	0	0	1134	730	0	22	0	9	6	0	1913
Taa T	27	2	0	2517	1609	0	34	0	47	11	0	4247
Tac T	19	0	0	2143	1475	0	16	0	16	10	0	3679
Tag T	7	2	0	488	285	0	8	1	5	3	0	799
Tca T	11	3	0	878	610	0	10	0	7	5	0	1524
Tcc T	9	2	0	620	363	0	5	0	7	7	0	1013
Tcg T	4	0	0	66	58	0	3	0	1	0	0	132
Tga T	4	0	0	577	377	0	7	0	4	3	0	972
Tgc T	13	4	0	507	394	0	8	0	5	1	0	932
Tgg T	11	3	0	733	486	0	15	0	14	7	0	1269
Tta T	28	0	0	1261	764	0	13	0	24	3	0	2093
Ttc T	18	0	0	1090	633	0	10	2	16	7	0	1776
Ttg T	16	1	0	1437	904	0	13	1	15	9	0	2396
